# Supplementary material
Source: PubMed Central journal article supplement (PMC6614025)

# Supplemental Figure S1

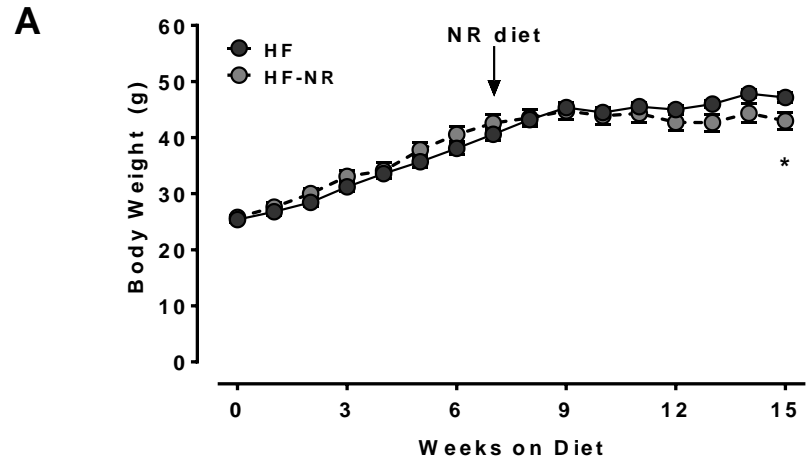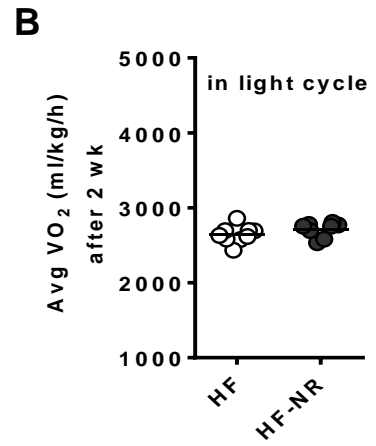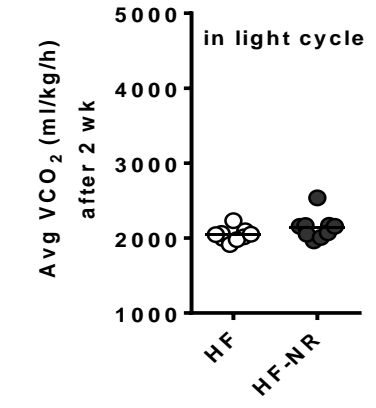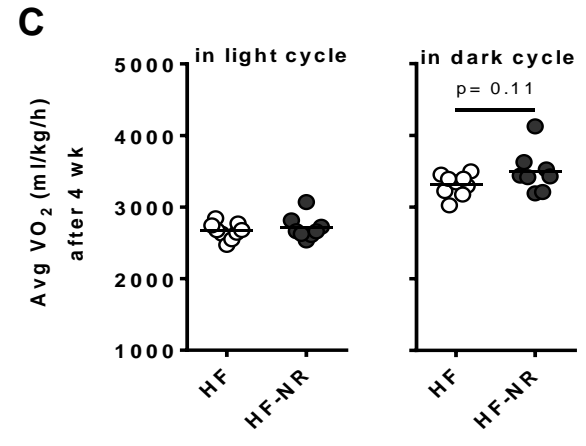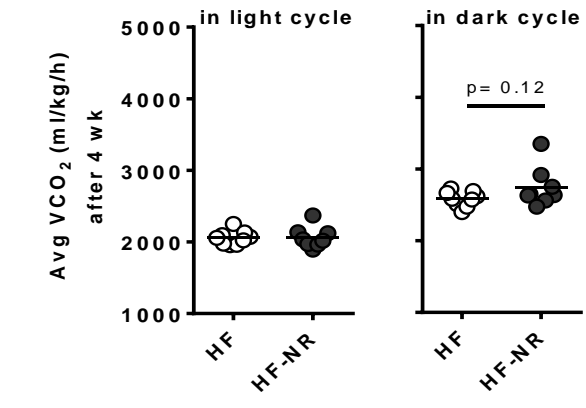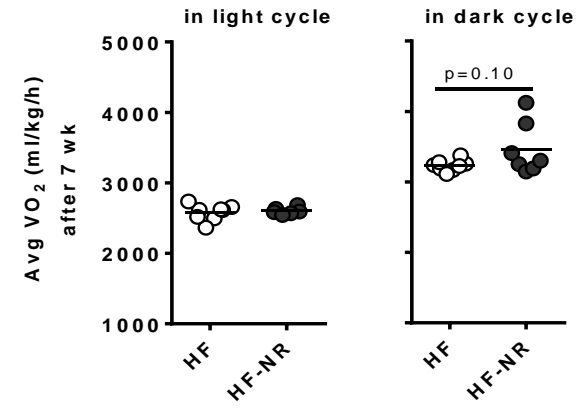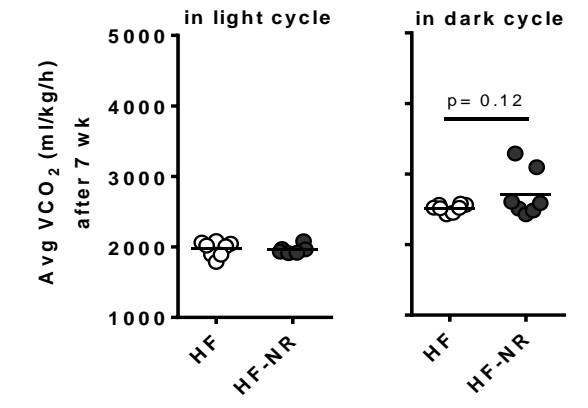

Supplement: NIHMS1532182-supplement-1.pdf [file NIHMS1532182-supplement-1.pdf]
